# Supplementary material for: Lmx1a Encodes a Rostral Set of Mesodiencephalic Dopaminergic Neurons Marked by the Wnt/B-Catenin Signaling Activator R-spondin 2
Source: PubMed Central journal article supplement (PMC3774790; doi:10.1371/journal.pone.0074049), 2013-09-16
Supplement: pone.0074049.s009.pdf [file pone.0074049.s009.pdf]

**Table S3. A selection of genes regulated in E12.5 *Lmx1a-dr/dr* mouse embryos**

| Gene symbol                                          | Description                                                        | Fold-change | Log2-ratio | p-value |
|------------------------------------------------------|--------------------------------------------------------------------|-------------|------------|---------|
| <b>Genes implicated in mdDA development/function</b> |                                                                    |             |            |         |
| <i>Nr4a2</i>                                         | Nuclear receptor subfamily 4 group A member 2 (Nurr1)              | 0.59        | -0.75      | 0.0020  |
| <i>C130021120Rik</i>                                 | Putative uncharacterized protein                                   | 0,64        | -0,64      | 0.0002  |
| <i>Lmx1a</i>                                         | LIM homeobox transcription factor 1-alpha (LMX-1.1)                | 0.65        | -0.61      | 0.0000  |
| <i>TH</i>                                            | Tyrosine 3-monooxygenase (Tyrosine 3-hydroxylase)(TH)              | 0.68        | -0.56      | 0.0006  |
| <i>Brunol6</i>                                       | CUG-BP- and ETR-3-like factor 6 (CELF-6)(Bruno-like protein 6)     | 0.70        | -0.51      | 0.0022  |
| <i>Arx</i>                                           | Homeobox protein ARX (Aristaless-related homeobox)                 | 0.73        | -0.46      | 0.0018  |
| <b>Transcription factors</b>                         |                                                                    |             |            |         |
| <i>Nr4a2</i>                                         | Nuclear receptor subfamily 4 group A member 2 (Nurr1)              | 0.59        | -0.75      | 0.0020  |
| <i>Dtx3</i>                                          | Protein deltex-3 (Deltex3) (mDTX3)                                 | 0.64        | -0.64      | 0.0002  |
| <i>Lmx1a</i>                                         | LIM homeobox transcription factor 1-alpha (LMX-1.1)                | 0.65        | -0.61      | 0.0000  |
| <i>Pa2g4</i>                                         | Proliferation-associated protein 2G4                               | 0.68        | -0.56      | 0.0012  |
| <i>Thra</i>                                          | Thyroid hormone receptor alpha (Nr1a1)                             | 0.68        | -0.55      | 0.0002  |
| <i>Pitx2</i>                                         | Pituitary homeobox 2 (Paired-like HD transcription factor 2)       | 0.69        | -0.53      | 0.0006  |
| <i>Zzef1</i>                                         | Zinc finger ZZ-type and EF-hand domain-containing protein 1        | 0.70        | -0.50      | 0.0014  |
| <i>Bat2</i>                                          | Large proline-rich protein BAT2 (HLA-B-associated transcript 2)    | 0.71        | -0.50      | 0.0020  |
| <i>Arx</i>                                           | Homeobox protein ARX (Aristaless-related homeobox)                 | 0.73        | -0.46      | 0.0018  |
| <i>Cas1</i>                                          | Zinc finger protein castor homolog 1 (Castor-related protein)      | 0.74        | -0.43      | 0.0066  |
| <i>Med25</i>                                         | Mediator of RNA polymerase II transcription subunit 25             | 0.75        | -0.41      | 0.0064  |
| <i>Meis3</i>                                         | Homeobox protein Meis3 (Meis1-related protein 2)                   | 0.76        | -0.40      | 0.0024  |
| <i>Sf1</i>                                           | Splicing factor 1 (Zinc finger protein 162)                        | 0.76        | -0.39      | 0.0044  |
| <i>Cnot4</i>                                         | CCR4-NOT transcription complex subunit 4                           | 1.33        | 0.41       | 0.0034  |
| <i>Lhx9</i>                                          | LIM/homeobox protein Lhx9 (LIM homeobox protein 9)                 | 1.34        | 0.42       | 0.0438  |
| <i>Pou4f1</i>                                        | POU domain, class 4, transcription factor 1 (Brn-3A)(Brn-3.0).     | 1,44        | 0.52       | 0.0044  |
| <i>Rnf152</i>                                        | RING finger protein 152                                            | 1.44        | 0.53       | 0.0060  |
| <i>Pbx1</i>                                          | Pre-B-cell leukemia transcription factor 1 (Homeobox protein PBX1) | 1,77        | 0.82       | 0.0000  |
| <i>Usf1</i>                                          | Upstream stimulatory factor 1 (Major late transcription factor 1)  | 1.82        | 0.86       | 0.0012  |
| <b>Homeodomain genes</b>                             |                                                                    |             |            |         |
| <i>Lmx1a</i>                                         | LIM homeobox transcription factor 1-alpha (LMX-1.1)                | 0.65        | -0.61      | 0.0000  |
| <i>Pitx2</i>                                         | Pituitary homeobox 2 (Paired-like HD transcription factor 2)       | 0.69        | -0.53      | 0.0006  |
| <i>Arx</i>                                           | Homeobox protein ARX (Aristaless-related homeobox)                 | 0.73        | -0.46      | 0.0018  |
| <i>Meis3</i>                                         | Homeobox protein Meis3 (Meis1-related protein 2)                   | 0.76        | -0.40      | 0.0024  |
| <i>Zfhx2</i>                                         | Zinc finger homeobox 2                                             | 0.78        | -0.36      | 0.0132  |
| <i>Lhx9</i>                                          | LIM/homeobox protein Lhx9 (LIM homeobox protein 9)                 | 1.34        | 0.42       | 0.0438  |
| <i>Pou4f1</i>                                        | POU domain, class 4, transcription factor 1 (Brn-3A)(Brn-3.0).     | 1,44        | 0.52       | 0.0044  |
| <i>Pbx1</i>                                          | Pre-B-cell leukemia transcription factor 1 (Homeobox protein PBX1) | 1,77        | 0.82       | 0.0000  |
| <b>Axon guidance</b>                                 |                                                                    |             |            |         |
| <i>Vangl2</i>                                        | Vang-like protein 2 (Van Gogh-like protein 2)                      | 0.48        | -1.06      | 0.0012  |
| <i>Sema4g</i>                                        | Semaphorin-4G Precursor                                            | 0.74        | -0.43      | 0.0122  |
| <b>Migration</b>                                     |                                                                    |             |            |         |
| <i>Dab1</i>                                          | Disabled homolog 1                                                 | 0.79        | -0.34      | 0.0188  |
